# Supplementary material
Source: PubMed Central journal article supplement (PMC8475778)

**Supplemental Digital Appendix 1**  
**Skills Assessment Checklist from a Train-the-Trainers Curriculum Focused on Teaching Appropriate Use of Personal Protective Equipment (PPE) and COVID-19 Airway Management, University of Michigan Medical School, 2020**

| <b>Does the trainer complete the following:</b>                        | <b>Yes</b> | <b>No</b> |
|------------------------------------------------------------------------|------------|-----------|
| Discuss PPE and Airway Checklist                                       |            |           |
| Demonstrate PPE donning and doffing as directed by the checklist       |            |           |
| Maintain sequence of: discuss, demonstrate, then let learners practice |            |           |
| Assess learner needs by asking for questions or clarifications         |            |           |
| Attend to multiple learner roles and levels of training                |            |           |
| Assess learner's adherence to checklist                                |            |           |
| Adequately manage multiple individuals in a small group                |            |           |

## Supplemental Digital Appendix 2

### Number of COVID-19 Airway Management In Situ Simulation Session Learners By Date, University of Michigan Medical School, 2020

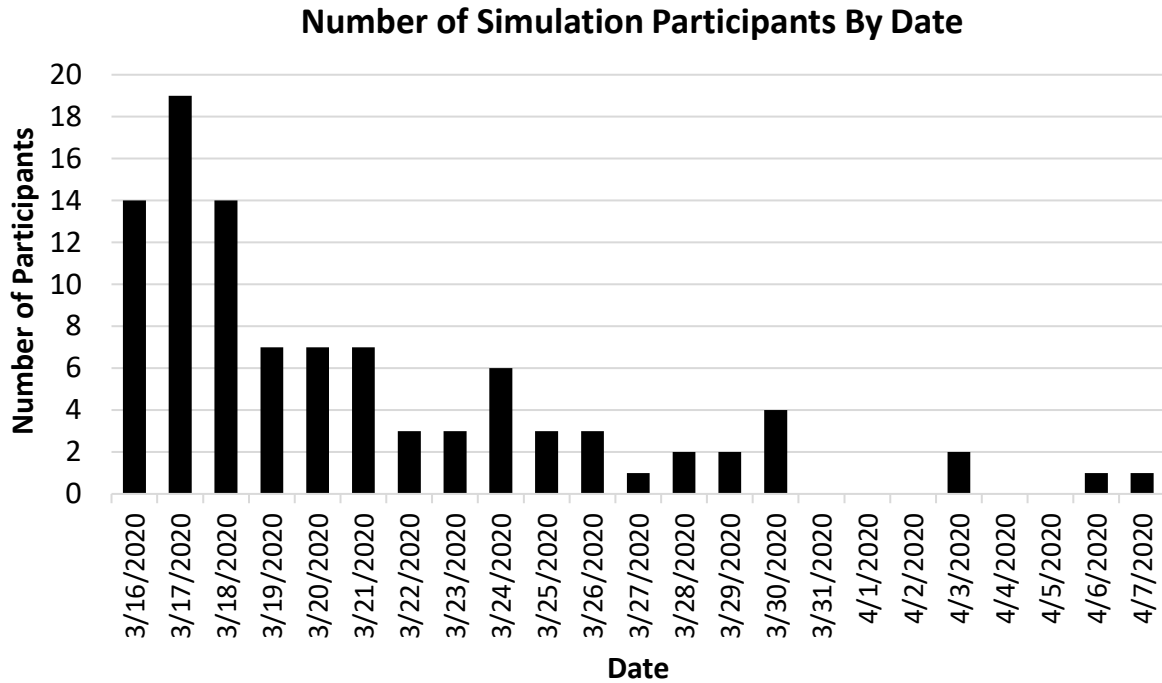

Supplement: acm-96-1414-s001.pdf [file acm-96-1414-s001.pdf]
